# Supplementary material for: Toxoplasma acyl-CoA synthetase TgACS3 is crucial to channel host fatty acids in lipid droplets and for parasite propagation
Source: PubMed Central journal article supplement — J Lipid Res. 2024 Sep 19;65(10):100645. doi: 10.1016/j.jlr.2024.100645 (PMC11526091; doi:10.1016/j.jlr.2024.100645), 2024-09-19

Integrated regions

| T7S4<br>SD03 + SD04 |             | DHFR cassette<br>SD01 + SD02 |             | GENE-SHIFT<br>SD01 + SD04 |             |
|---------------------|-------------|------------------------------|-------------|---------------------------|-------------|
| Wild type           | ACS3 mutant | Wildtype                     | ACS3 mutant | Wildtype                  | ACS3 mutant |

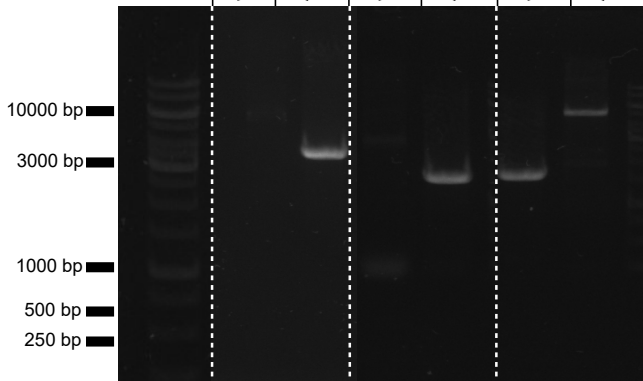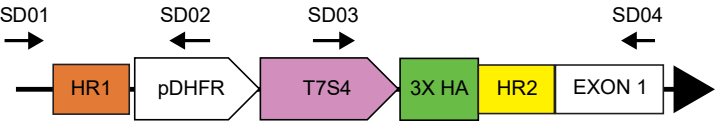

Supplement: mmc3.pdf [file mmc3.pdf]
