# Supplementary figures and images for: Toxoplasma acyl-CoA synthetase TgACS3 is crucial to channel host fatty acids in lipid droplets and for parasite propagation
Source: PubMed Central journal article supplement — J Lipid Res. 2024 Sep 19;65(10):100645. doi: 10.1016/j.jlr.2024.100645 (PMC11526091; doi:10.1016/j.jlr.2024.100645), 2024-09-19

**a**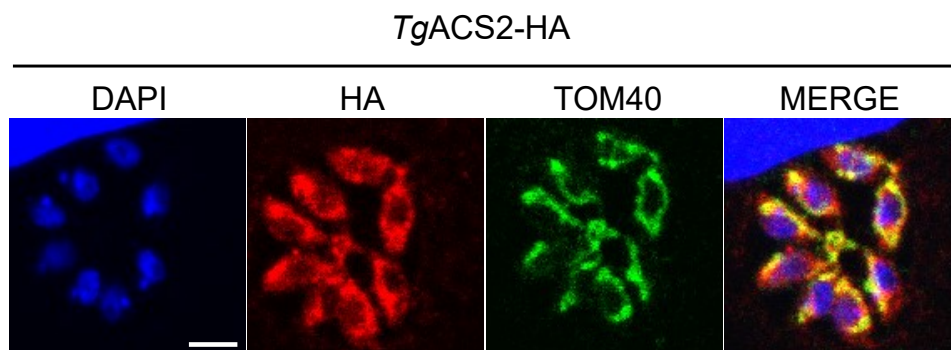**b**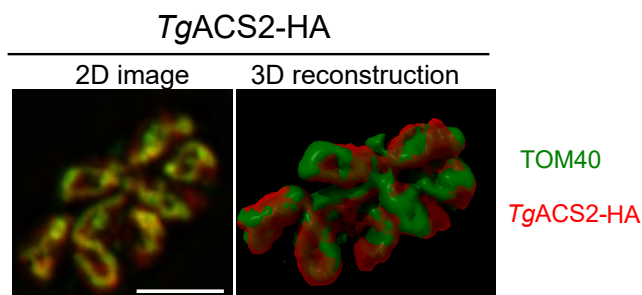**c**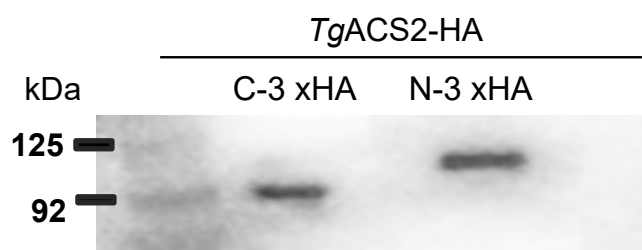**d**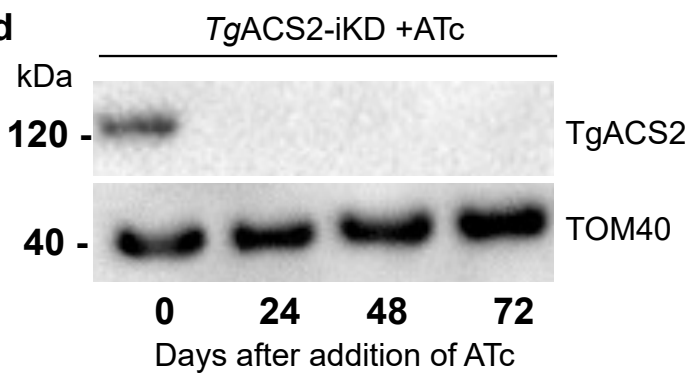**e**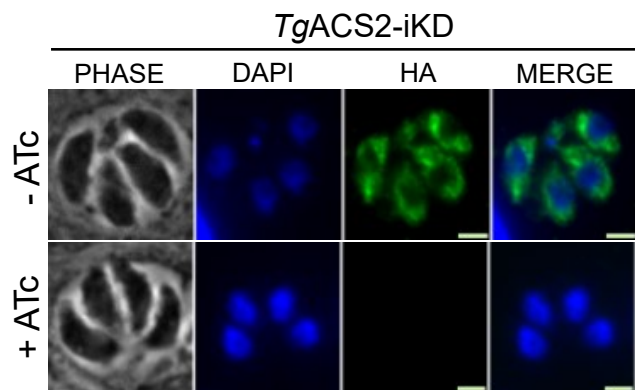**f**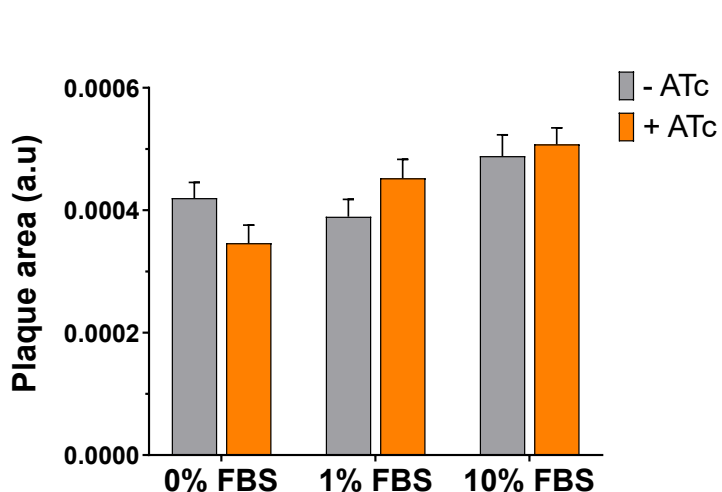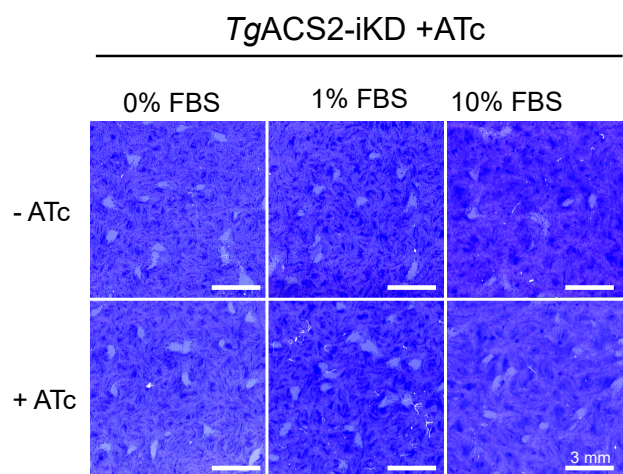

Supplement: mmc2.pdf [file mmc2.pdf]

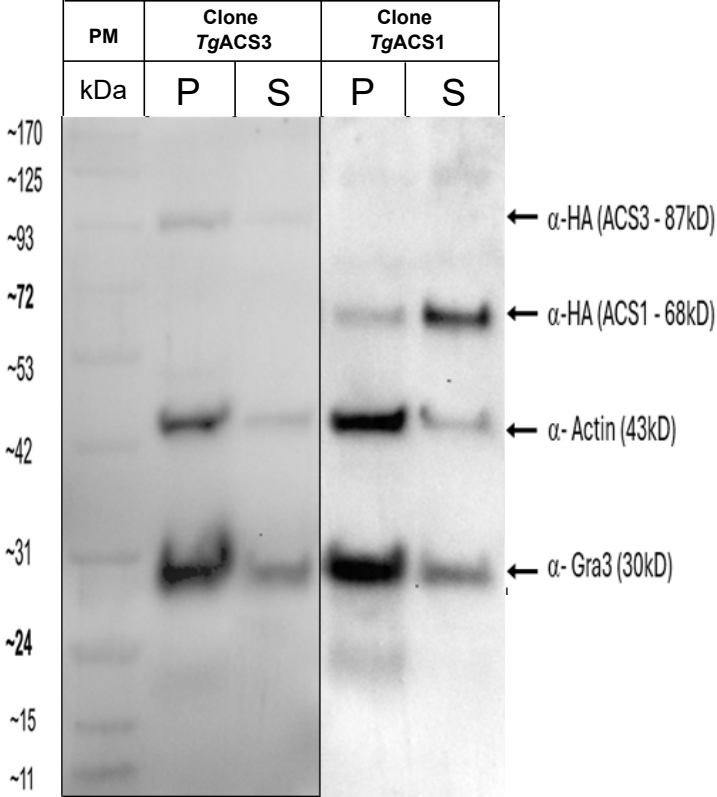

Supplement: mmc4.pdf [file mmc4.pdf]
